# Supplementary material for: HPLC-ESI-qTOF-MS/MS Characterization, Antioxidant Activities and Inhibitory Ability of Digestive Enzymes with Molecular Docking Analysis of Various Parts of Raspberry (Rubus ideaus L.)
Source: PubMed Central journal article supplement (PMC6719955; doi:10.3390/antiox8080274), 2019-08-03
Supplement: antioxidants-08-00274-s001.pdf [file antioxidants-08-00274-s001.pdf]

**Supplementary Material Table S1** Regression equation, R<sup>2</sup>, LOD, and LOQ results of the main individual phenolics of various parts in raspberry

| Analytes                   | <sup>a</sup> Calibration curve     | R <sup>2</sup> | <sup>b</sup> LOD (mg/L) | <sup>b</sup> LOQ (mg/L) |
|----------------------------|------------------------------------|----------------|-------------------------|-------------------------|
| Gallic acid                | $Y=7.8332 \times 10^{-6} X+0.0067$ | 0.9994         | 0.46                    | 0.79                    |
| Epicatechin                | $Y=5.9871 \times 10^{-6} X+0.0091$ | 0.9978         | 0.32                    | 0.56                    |
| Procyanidins B2            | $Y=4.2983 \times 10^{-6} X+0.0056$ | 0.9989         | 0.45                    | 0.67                    |
| Procyanidins C3            | $Y=3.7982 \times 10^{-6} X+0.0052$ | 0.9971         | 0.67                    | 0.71                    |
| Ellagic acid pentoside     | $Y=7.6245 \times 10^{-6} X+0.0031$ | 0.9991         | 0.57                    | 0.62                    |
| Rutin                      | $Y=2.7981 \times 10^{-6} X+0.0019$ | 0.9993         | 0.23                    | 0.35                    |
| Ellagic acid               | $Y=3.0157 \times 10^{-6} X+0.0073$ | 0.9992         | 0.37                    | 0.42                    |
| Quercetin 3-glucoside      | $Y=7.2459 \times 10^{-6} X+0.0051$ | 0.9995         | 0.19                    | 0.31                    |
| Avicularin                 | $Y=7.1982 \times 10^{-6} X+0.0049$ | 0.9934         | 0.54                    | 0.63                    |
| Kaempferol-7-O-glucuronide | $Y=6.9137 \times 10^{-6} X+0.0097$ | 0.9979         | 0.78                    | 0.87                    |
| Quercetin-3-O-glucuronide  | $Y=6.9819 \times 10^{-6} X+0.0057$ | 0.9992         | 0.63                    | 0.72                    |
| Kaempferol-3-O-glucuronide | $Y=6.4952 \times 10^{-6} X+0.0071$ | 0.9992         | 0.34                    | 0.45                    |

<sup>a</sup> X representing the peak area; Y representing the standard concentration

<sup>b</sup> LOD, limit of detection; LOQ, limit of quatification
